# Supplementary material
Source: PubMed Central journal article supplement (PMC2928903)
Supplement: jc.2009-2718_1.pdf [file jc.2009-2718_1.pdf]

**Supplementary Table 1** - Power for least powered fetal quantitative trait (neonatal 2-hour plasma glucose).

| <b>Population</b> | <b>N</b> | <b>Variance explained by QTL</b> | <b><math>\alpha = 0.001^*</math></b> | <b><math>\alpha = 0.01</math></b> | <b><math>\alpha = 0.05</math></b> |
|-------------------|----------|----------------------------------|--------------------------------------|-----------------------------------|-----------------------------------|
| Hispanic          | 706      | 0.10%                            | 0.33                                 | 0.61                              | 0.81                              |
|                   |          | 0.50%                            | 1.00                                 | 1.00                              | 1.00                              |
|                   |          | 1.00%                            | 1.00                                 | 1.00                              | 1.00                              |
| Afro-Caribbean    | 1035     | 0.10%                            | 0.54                                 | 0.79                              | 0.92                              |
|                   |          | 0.50%                            | 1.00                                 | 1.00                              | 1.00                              |
|                   |          | 1.00%                            | 1.00                                 | 1.00                              | 1.00                              |
| Thai              | 1895     | 0.10%                            | 0.88                                 | 0.97                              | 0.99                              |
|                   |          | 0.50%                            | 1.00                                 | 1.00                              | 1.00                              |
|                   |          | 1.00%                            | 1.00                                 | 1.00                              | 1.00                              |
| Caucasian         | 2052     | 0.10%                            | 0.91                                 | 0.98                              | 1.00                              |
|                   |          | 0.50%                            | 1.00                                 | 1.00                              | 1.00                              |
|                   |          | 1.00%                            | 1.00                                 | 1.00                              | 1.00                              |
| Total             | 5688     | 0.10%                            | 1.00                                 | 1.00                              | 1.00                              |
|                   |          | 0.50%                            | 1.00                                 | 1.00                              | 1.00                              |
|                   |          | 1.00%                            | 1.00                                 | 1.00                              | 1.00                              |

\*  $\alpha = 0.001$  was set as the lowest threshold by accounting for the number of models, phenotypes, and ethnicities analyzed, calculated for both mothers and babies.
